# Supplementary material for: Health-related quality of life of patients with brain metastases selected for stereotactic radiosurgery
Source: Springer Nature journal article supplement (doi:10.1007/s11060-019-03186-z), 2019-05-09
Supplement: MOESM1 [file 16711968]

# Health-related quality of life of patients with brain metastases selected for stereotactic radiosurgery

Eline Verhaak<sup>1,2,3</sup>, Karin Gehring<sup>1,2,3</sup>, Patrick E. J. Hanssens<sup>1,2</sup>, AND Margriet M. Sitskoorn<sup>2,3</sup>

<sup>1</sup> Gamma Knife Center, Elisabeth-TweeSteden Hospital, Tilburg, The Netherlands

<sup>2</sup> Department of Neurosurgery, Elisabeth-TweeSteden Hospital, Tilburg, The Netherlands

<sup>3</sup> Department of Cognitive Neuropsychology, Tilburg University, Tilburg, The Netherlands

Corresponding author: Karin Gehring (E-mail: k.gehring@tilburguniversity.edu, Telephone number: +31 13 466 4233)

## Non-cancer controls – CAR-Study A (NCT02953756)

Dutch non-cancer controls were recruited by convenience sampling of the broad network of the research group. Inclusion criteria were; age  $\geq 18$  years, no (history of) cancer and no cerebrovascular disease in the past 12 months. All controls signed informed consent. Characteristics of the control group are presented in Table 1.

**Table 1.** Characteristics

|                                      | No. of patients with BM (%) | No. of controls (%) | t-score | $\chi^2$ | $P^*$ |
|--------------------------------------|-----------------------------|---------------------|---------|----------|-------|
| <b>Number of participants</b>        | 92                          | 104                 |         |          |       |
| <b>Age in years</b> , median (range) | 63 (31-80)                  | 60 (31-87)          | 1.527   |          | .128  |
| <b>Sex</b> , male                    | 47 (51)                     | 50 (48)             |         | 0.177    | .674  |
| <b>Education<sup>a</sup></b>         |                             |                     |         | 4.626    | .099  |
| Low                                  | 28 (30)                     | 25 (24)             |         |          |       |
| Middle                               | 37 (40)                     | 33 (31)             |         |          |       |
| High                                 | 27 (29)                     | 46 (44)             |         |          |       |

Note: No.: number, percentages have been rounded and may not total to 100%

<sup>a</sup> The 7 categories to classify the level of education of the Verhage scale [1] were merged into low (Verhage 1 – 4), middle (Verhage 5), and high (Verhage 6 and 7) educational level

\* Corrected alpha of .02, using the Benjamini-Hochberg procedure [2]

Neuropsychological assessments were administered at baseline, and at 3 and 6 months thereafter. It took approximately 60 minutes to complete. The neuropsychological test battery included 6 short cognitive tests; Hopkins Verbal Learning Test-Revised, Trail Making Test, Controlled Oral Word Association, Wechsler Adult Intelligence Scale (WAIS) Digit Span, WAIS Digit Symbol and Grooved Pegboard [3-5].

## References

1. Verhage, F. (1964). *Intelligentie en leeftijd: onderzoek bij Nederlanders van twaalf tot zeventien jaar*. Assen, The Netherlands: Van Gorcum.
2. Benjamini, Y., & Hochberg, Y. (1995). Controlling the false discovery rate: a practical and powerful approach to multiple testing. *Journal of the royal statistical society. Series B (Methodological)*, 289-300.
3. Wefel, J. S., Vardy, J., Ahles, T., & Schagen, S. B. (2011). International Cognition and Cancer Task Force recommendations to harmonise studies of cognitive function in patients with cancer. *The lancet oncology*, 12(7), 703-708.
4. Witgert, M. E., & Meyers, C. A. (2011). Neurocognitive and quality of life measures in patients with metastatic brain disease. *Neurosurgery Clinics*, 22(1), 79-85.
5. Meyers, C. A., & Brown, P. D. (2006). Role and relevance of neurocognitive assessment in clinical trials of patients with CNS tumors. *Journal of clinical oncology*, 24(8), 1305-1309.
